# Supplementary material for: Cytotoxic and Apoptotic Activity of the Novel Harmine Derivative ZC-14 in Sf9 Cells
Source: MDPI journal article supplement (doi:10.3390/ijms19030811), 2018-03-11
Supplement: s1 [file s1]

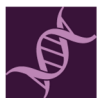

## Supplementary Materials: Cytotoxic and Apoptotic Activity of the Novel Harmine Derivative ZC-14 in Sf9 Cells

Jingjing Zhang, Zhijun Zhang, Benshui Shu, Gaofeng Cui and Guohua Zhong

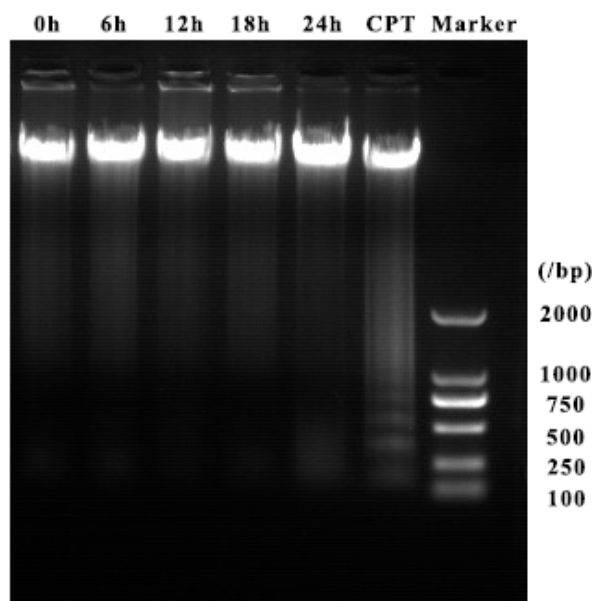

**Figure S1.** Agarose gel electrophoresis analysis of Sf9 cells genomic DNA with different treatments. The cells were treated with 7.5 µg/mL harmine for 0, 6, 12, 18 and 24 h, respectively. 1.0 µg/mL camptothecin treatment was regarded as positive control.

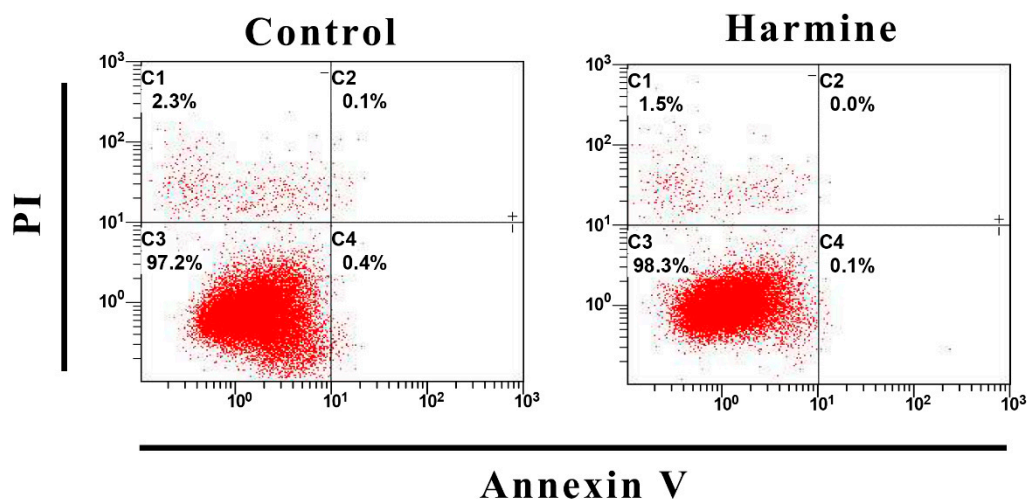

**Figure S2.** Apoptotic rate of control (0 h) and 7.5 µg/mL harmine treatment cells for 24 h were detected by flow cytometry.
